# Supplementary material for: Synthesis and temperature-dependent NMR studies of monomeric and dimeric tris(dialkylamido)alanes
Source: Royal Society of Chemistry journal article supplement (doi:10.1039/d2dt00508e), 2022-01-01
Supplement: d2dt00508e1.pdf [file d2dt00508e1.pdf]

## Dalton Transactions

### **Synthesis and temperature-dependent NMR studies of monomeric and dimeric tris(dialkylamino)alanes**

Erik Schumann, Uwe Böhme, Erica Brendler and Florian Mertens

#### Electronic Supplementary Information

DOI: 0.0000/xxxxxxxxxx

## Crystal structures

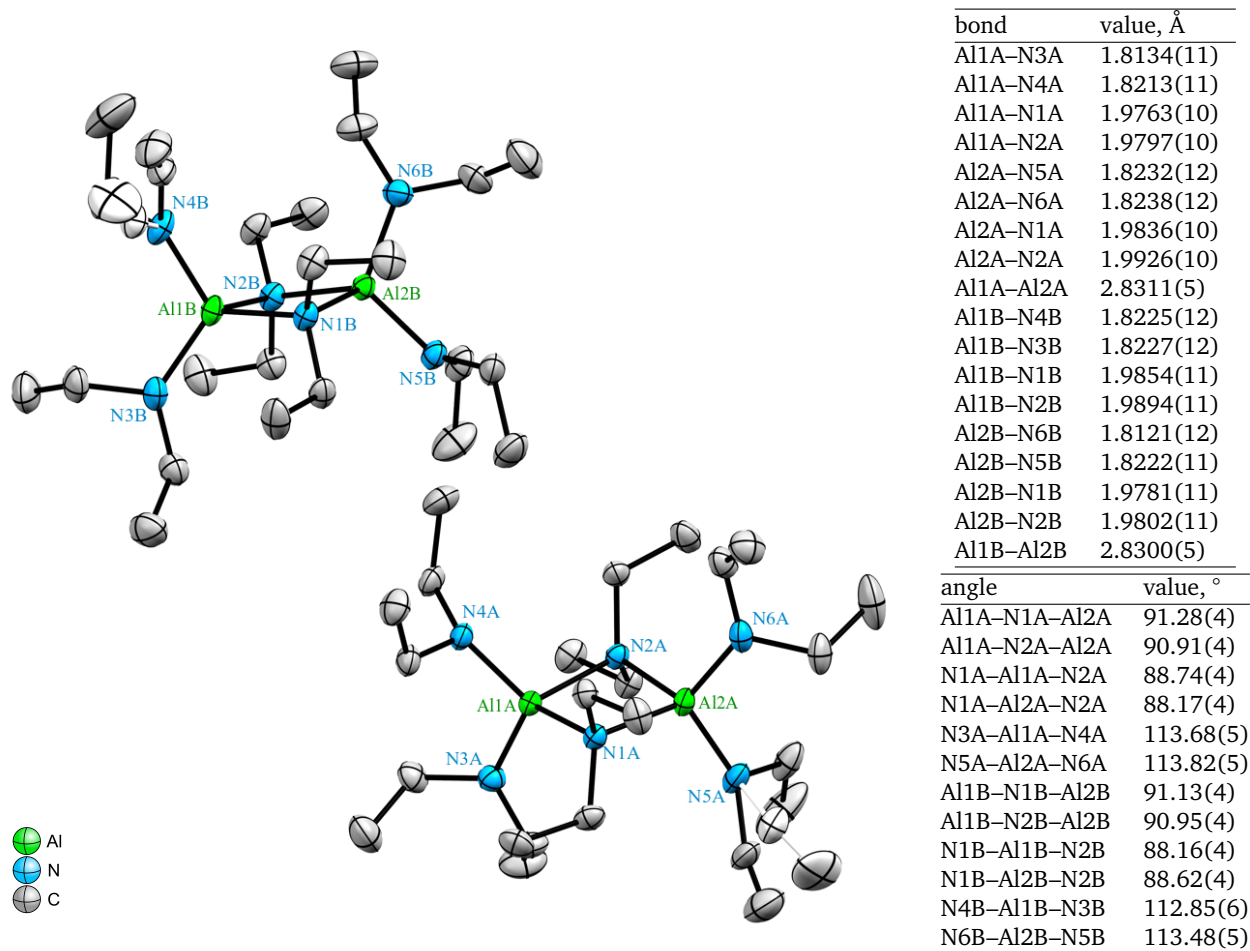

Fig. ESI.1 Asymmetric unit of tris(diethylamino)alane (left); selected bond lengths and angles (right).

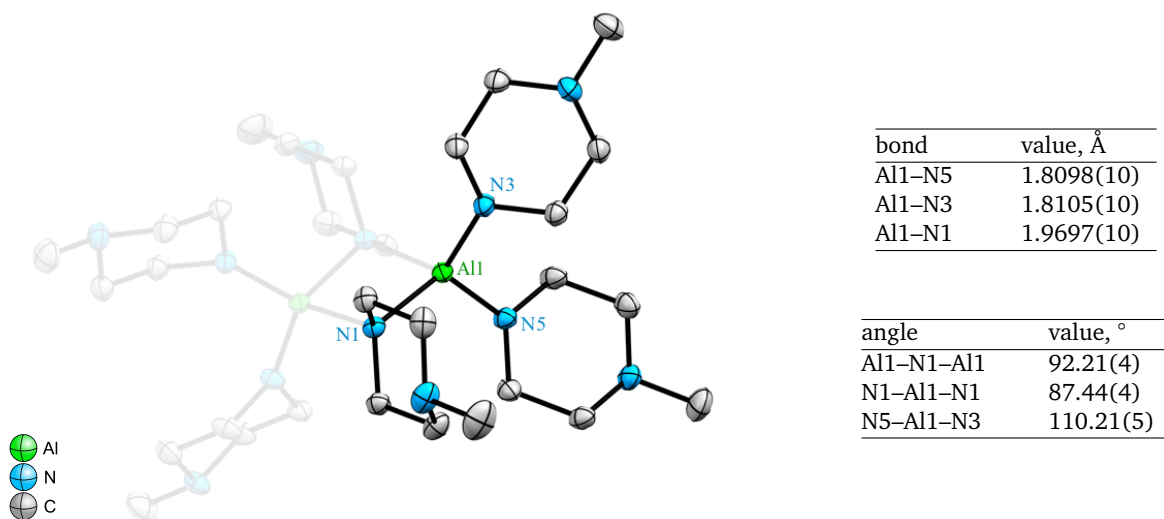

Fig. ESI.2 Asymmetric unit of tris(*N*-methylpiperazino)alane (left); selected bond lengths and angles (right).

## Synthetic procedures

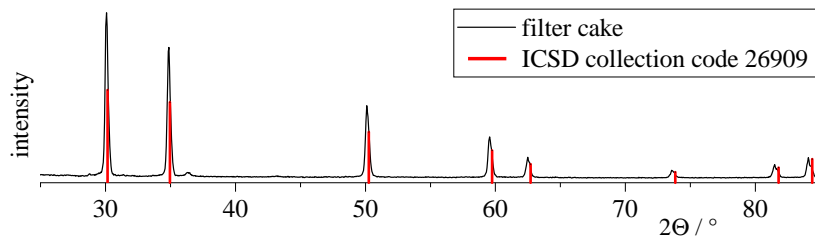

Fig. ESI.3 Example of a powder diffractogram of the separated lithium chloride.

## Aluminum titration

$\text{AlH}_3 \cdot \frac{1}{5}\text{Et}_2\text{O}_{(s)}$  is carefully deactivated by diffusion of water vapor. The substance is then transferred to a 100 mL beaker containing 20 mL of distilled water and 10 mL of hydrochloric acid ( $2 \text{ molL}^{-1}$ ). The suspension is heated to boiling and the resulting clear solution is transferred to a 100 mL volumetric flask. To 25 mL of the solution, 30 mL of an EDTA solution ( $0.025 \text{ molL}^{-1}$ ) and 1 mL of hydrochloric acid ( $2 \text{ molL}^{-1}$ ) are added. The solution is boiled for 10 min and then cooled to room temperature. A pH value of 7 is adjusted with  $\text{CH}_3\text{COONa}$ . By adding a spatula tip of a xylenol orange/ $\text{KNO}_3$  trituration (1:100), the solution takes on an intense yellow color. Using a  $\text{ZnSO}_4$  solution ( $0.2 \text{ molL}^{-1}$ ), the yellow solution is titrated until an orange color is apparent.

## Temperature-dependent NMR spectra

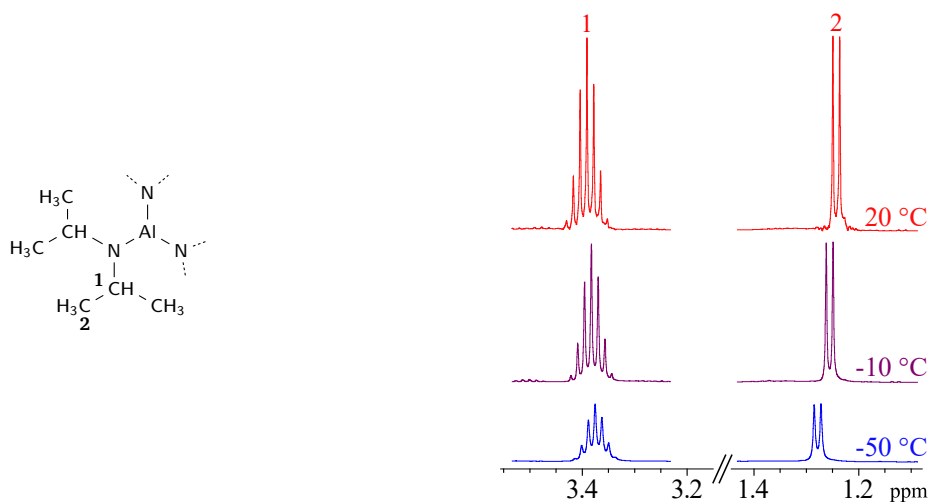

Fig. ESI.4 Temperature-dependent  $^1\text{H}$  NMR spectra of tris(diisopropylamino)alane.

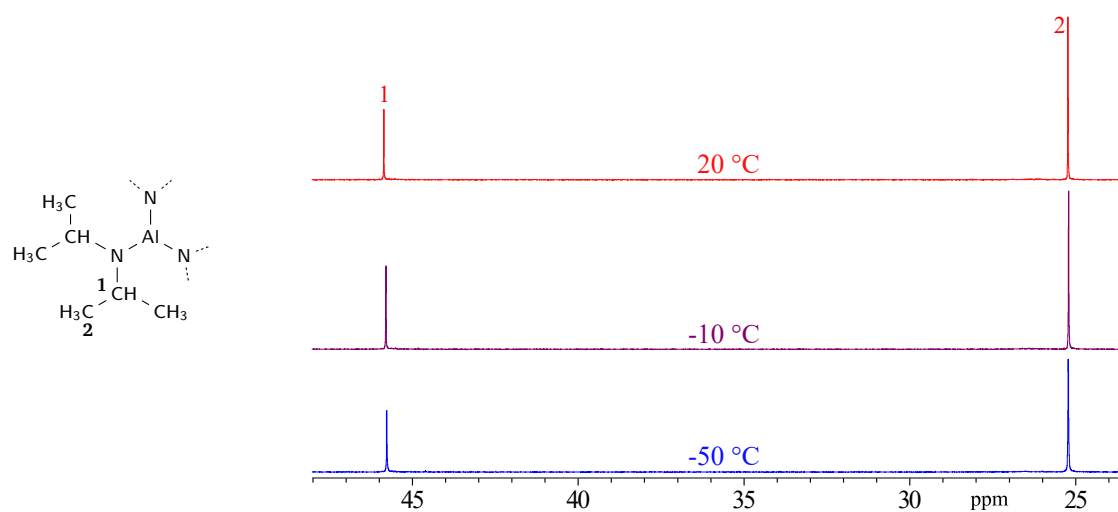

Fig. ESI.5 Temperature-dependent  $^{13}\text{C}$  NMR spectra of tris(diisopropylamino)alane.

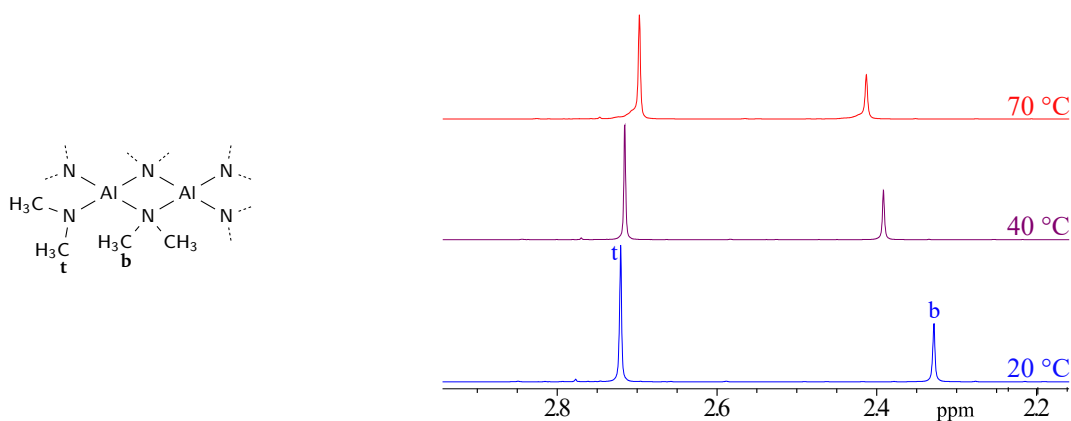

Fig. ESI.6 Temperature-dependent  $^1\text{H}$  NMR spectra of tris(dimethylamino)alane.

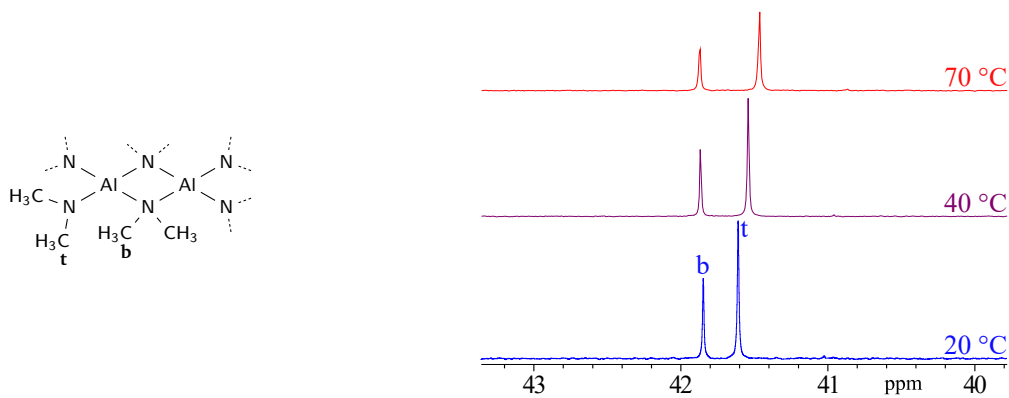

Fig. ESI.7 Temperature-dependent  $^{13}\text{C}$  NMR spectra of tris(dimethylamino)alane.

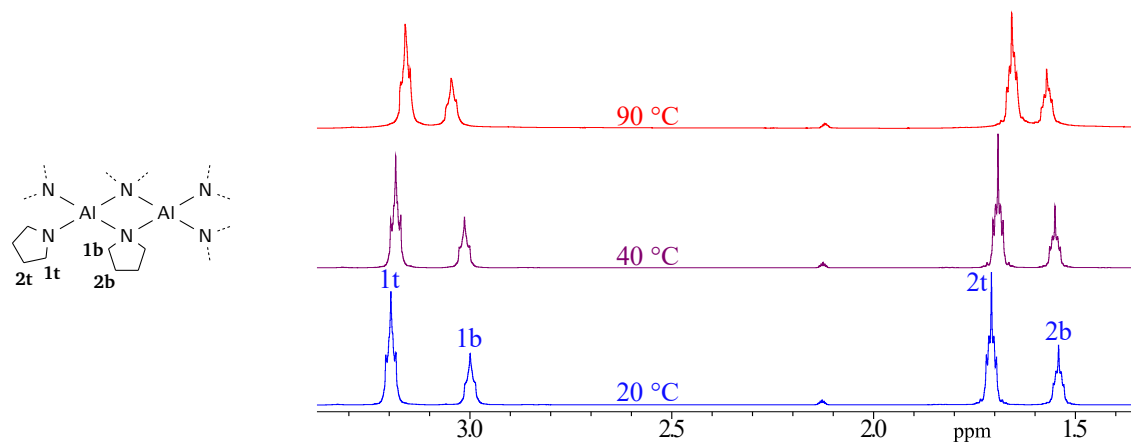

Fig. ESI.8 Temperature-dependent  $^1\text{H}$  NMR spectra of tris(pyrrolidino)alane.

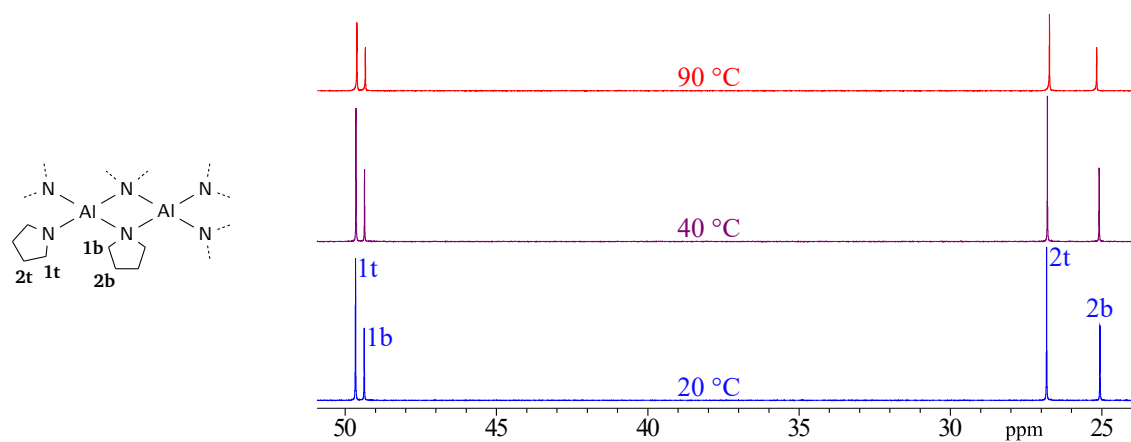

Fig. ESI.9 Temperature-dependent  $^{13}\text{C}$  NMR spectra of tris(pyrrolidino)alane.

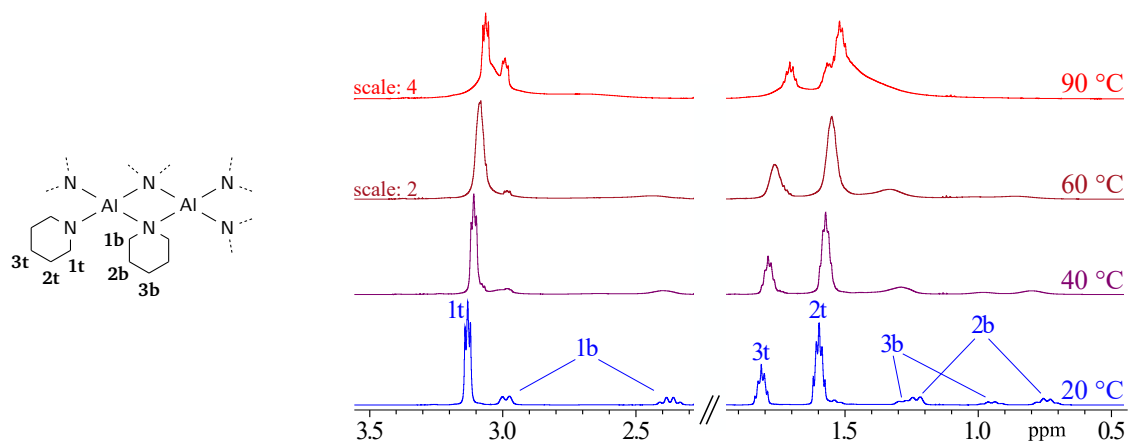

Fig. ESI.10 Temperature-dependent  $^1\text{H}$  NMR spectra of tris(piperidino)alane.

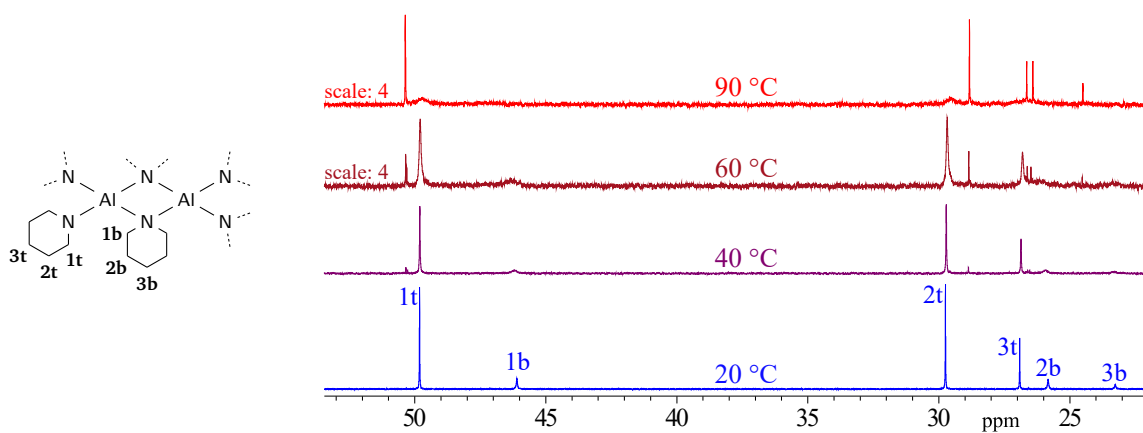

Fig. ESI.11 Temperature-dependent <sup>13</sup>C NMR spectra of tris(piperidino)alane.
